# Supplementary material for: Assessing improvements in global ocean pCO 2 machine learning reconstructions with Southern Ocean autonomous sampling
Source: Copernicus journal article supplement (doi:10.5194/bg-2023-160), 2023-10-10
Supplement: Supplementary file 1 [file bg-2023-160-supplement.pdf]

1 **Supplement**

2

3 **Assessing improvements in global ocean pCO<sub>2</sub> machine learning reconstructions with Southern Ocean autonomous sampling**

4 Thea H. Heimdal<sup>1</sup>, Galen A. McKinley<sup>1</sup>, Adrienne J. Sutton<sup>2</sup>, Amanda R. Fay<sup>1</sup>, Lucas Gloege<sup>3</sup>

5 <sup>1</sup>Columbia University and Lamont-Doherty Earth Observatory, Palisades, NY, USA

6 <sup>2</sup>Pacific Marine Environmental Laboratory, National Oceanic and Atmospheric Administration, Seattle, WA, USA

7 <sup>3</sup>Open Earth Foundation, Marina del Rey, CA, USA

8

9 *Correspondence to:* Thea H. Heimdal (theimdal@ldeo.columbia.edu)

10

11

12

13

14

15

16

17

18

19

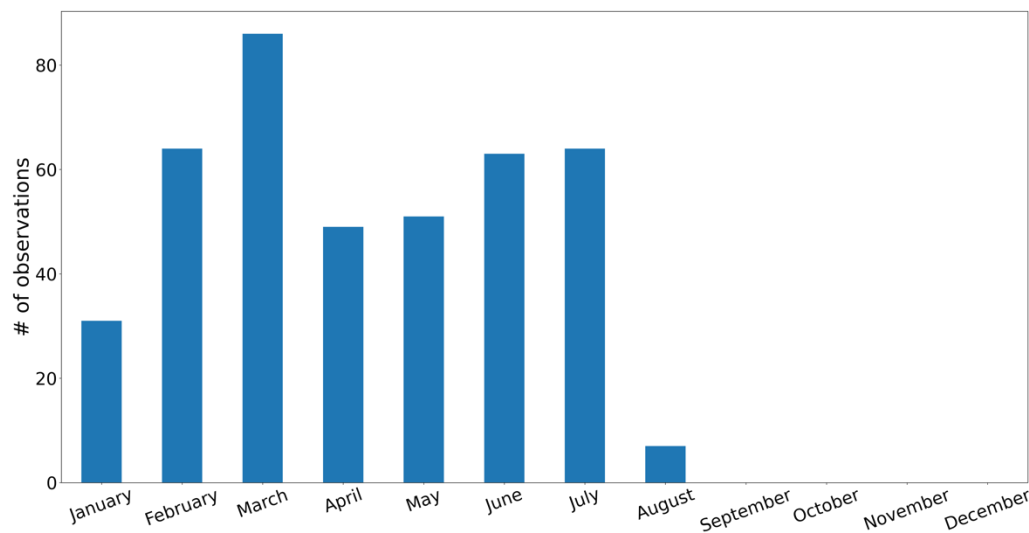

20  
21 **Figure S1:** Number of monthly 1°x1° observations from the 'real-world' SAILDRONE USV journey in Sutton et al. (2021).  
22  
23

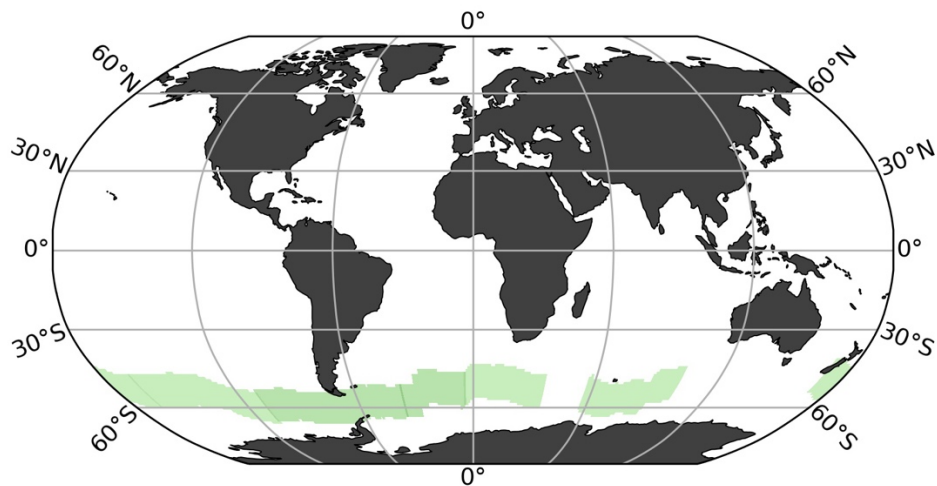

24  
25 **Figure S2:** Map showing the spatial extent of sampling with 13 SAILDRONE USVs for run 'x13\_10Y\_J-A' and 'x13\_10Y\_W'. The 'real-world' USV track from  
26 Sutton et al. (2021) was repeated six times by 1°, covering an additional 6° both north and south.  
27

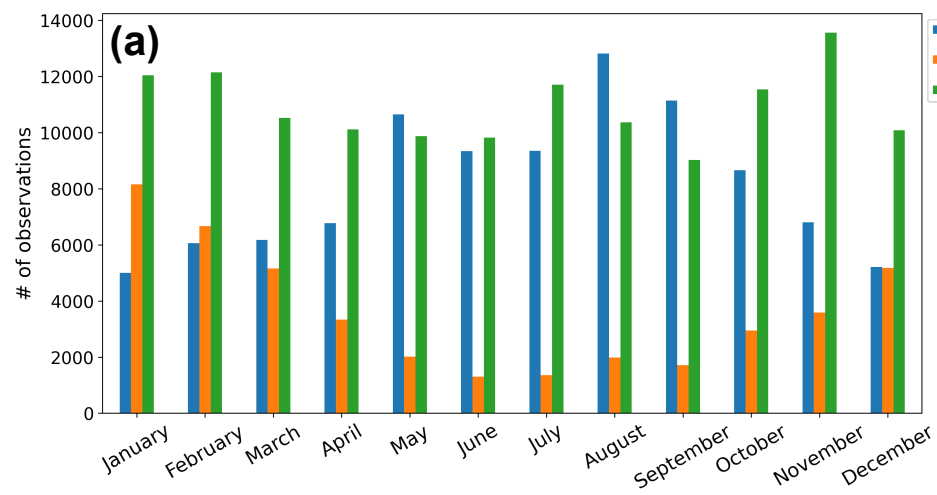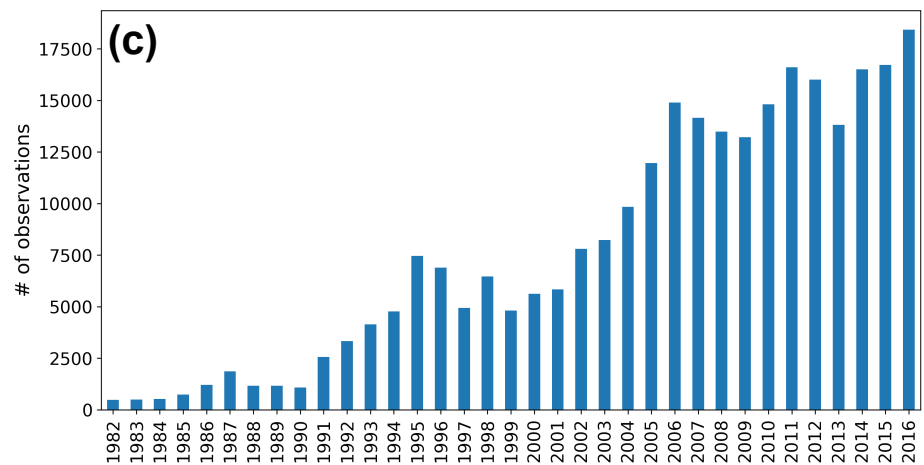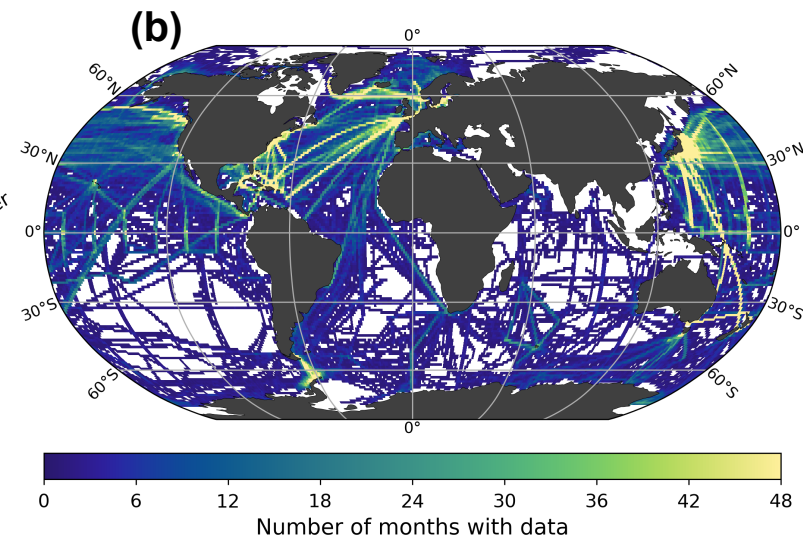

**Figure S3:** SOCAT observations from 1982-2016. Number of monthly 1°x1 SOCAT observations per month (a). Spatial extent of SOCAT tracks and number of monthly observations per 1°x1° grid cell (b). Number of monthly 1°x1 SOCAT observations per year (c).

28  
29  
30  
31  
32

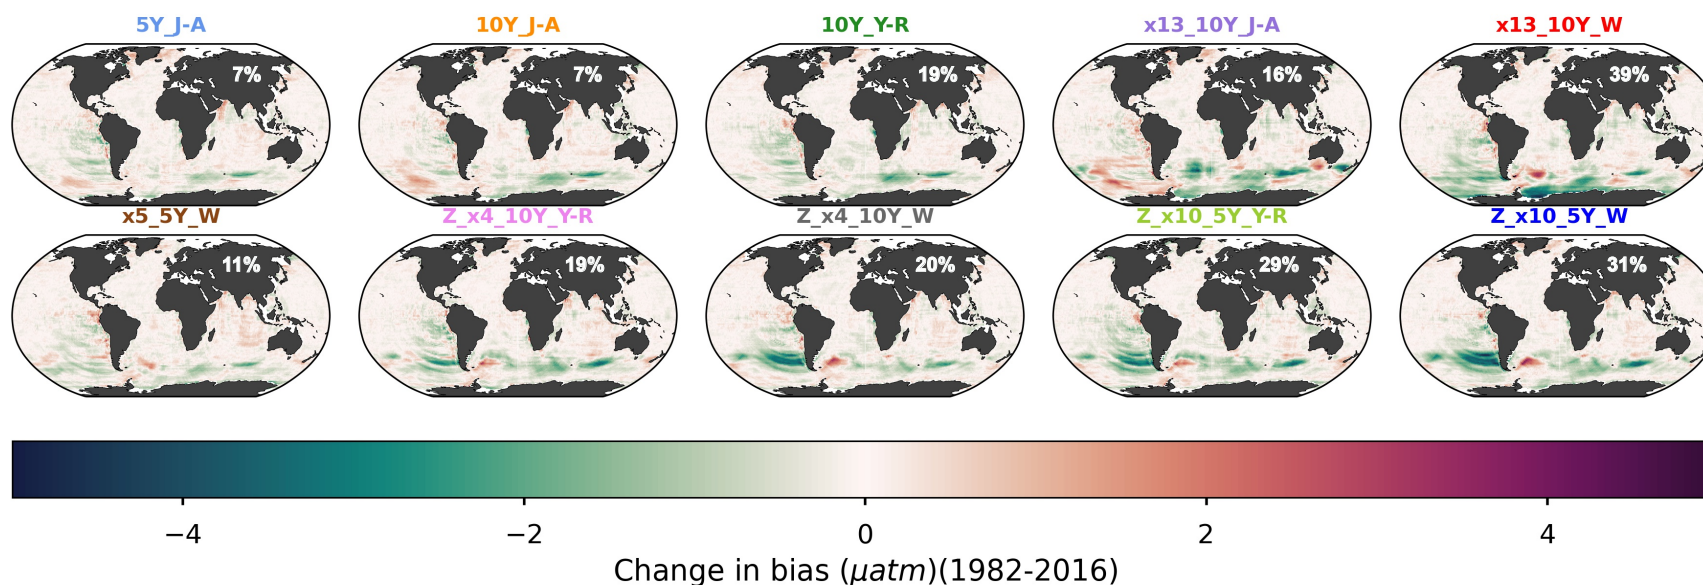

33  
 34 **Figure S4.** Change in bias when comparing the different Sailldrone USV sampling strategies (see **Table 1**) to the baseline SOCAT reconstruction. The bias was  
 35 calculated by comparing each machine learning reconstruction to the testbed ‘model truth’ averaged over the 75 ensemble members over the period of 1982 through  
 36 2016. Red and green areas represent regions where the change in bias is positive or negative, respectively. Generally, there is a negative change in bias in southern  
 37 latitudes, indicating an improvement over the baseline that overestimated pCO<sub>2</sub> (**Fig. 3a**). The green shadings indicate therefore improvement in bias compared to  
 38 using SOCAT data alone. The improvement compared to the SOCAT baseline is shown by percent values (global average for 1982-2016). The ‘one-latitude’-run  
 39 ‘x13\_10Y\_W’ demonstrates the most significant improvement (i.e., 39%).  
 40  
 41



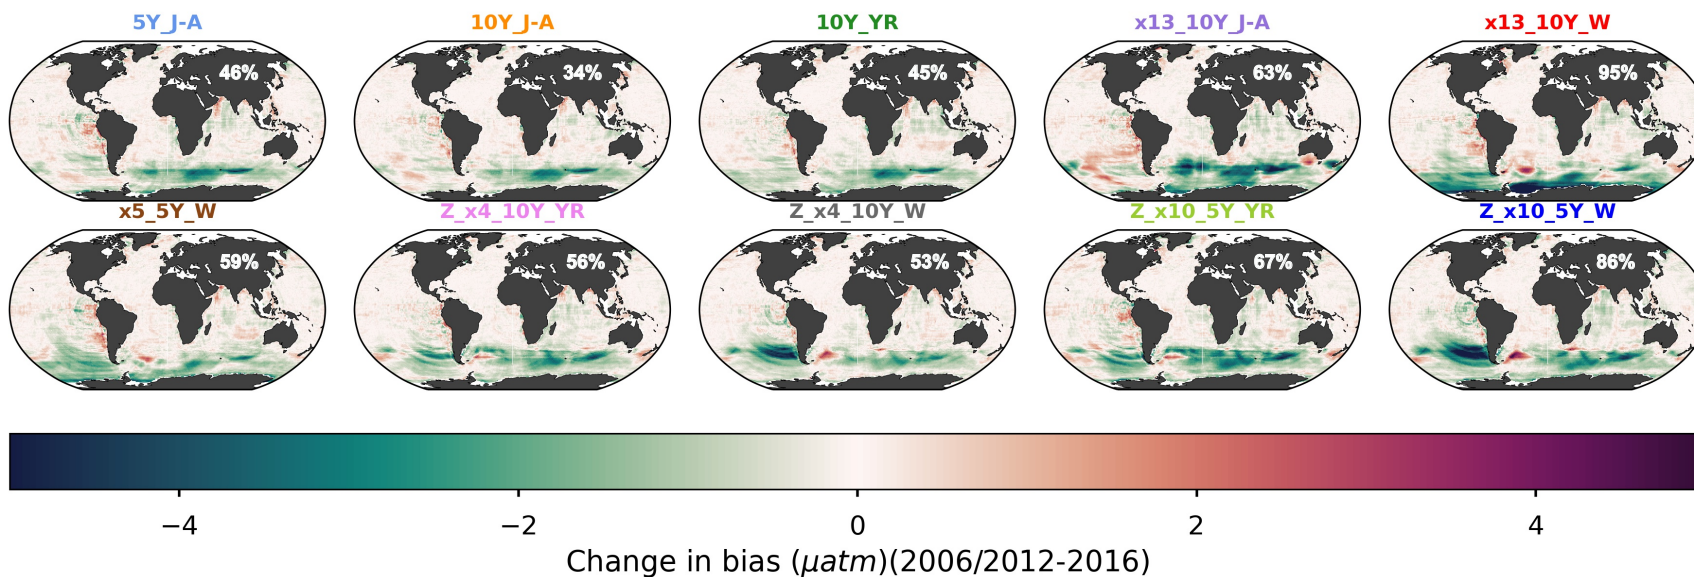

42  
 43 **Figure S5:** Same as **Figure A4**, but averaged over the years of USV sample addition (2006-2016 or 2012-2016). There is significant improvement in bias for all  
 44 runs compared to the entire testbed period (1982-2016; **Fig. A4**).  
 45  
 46

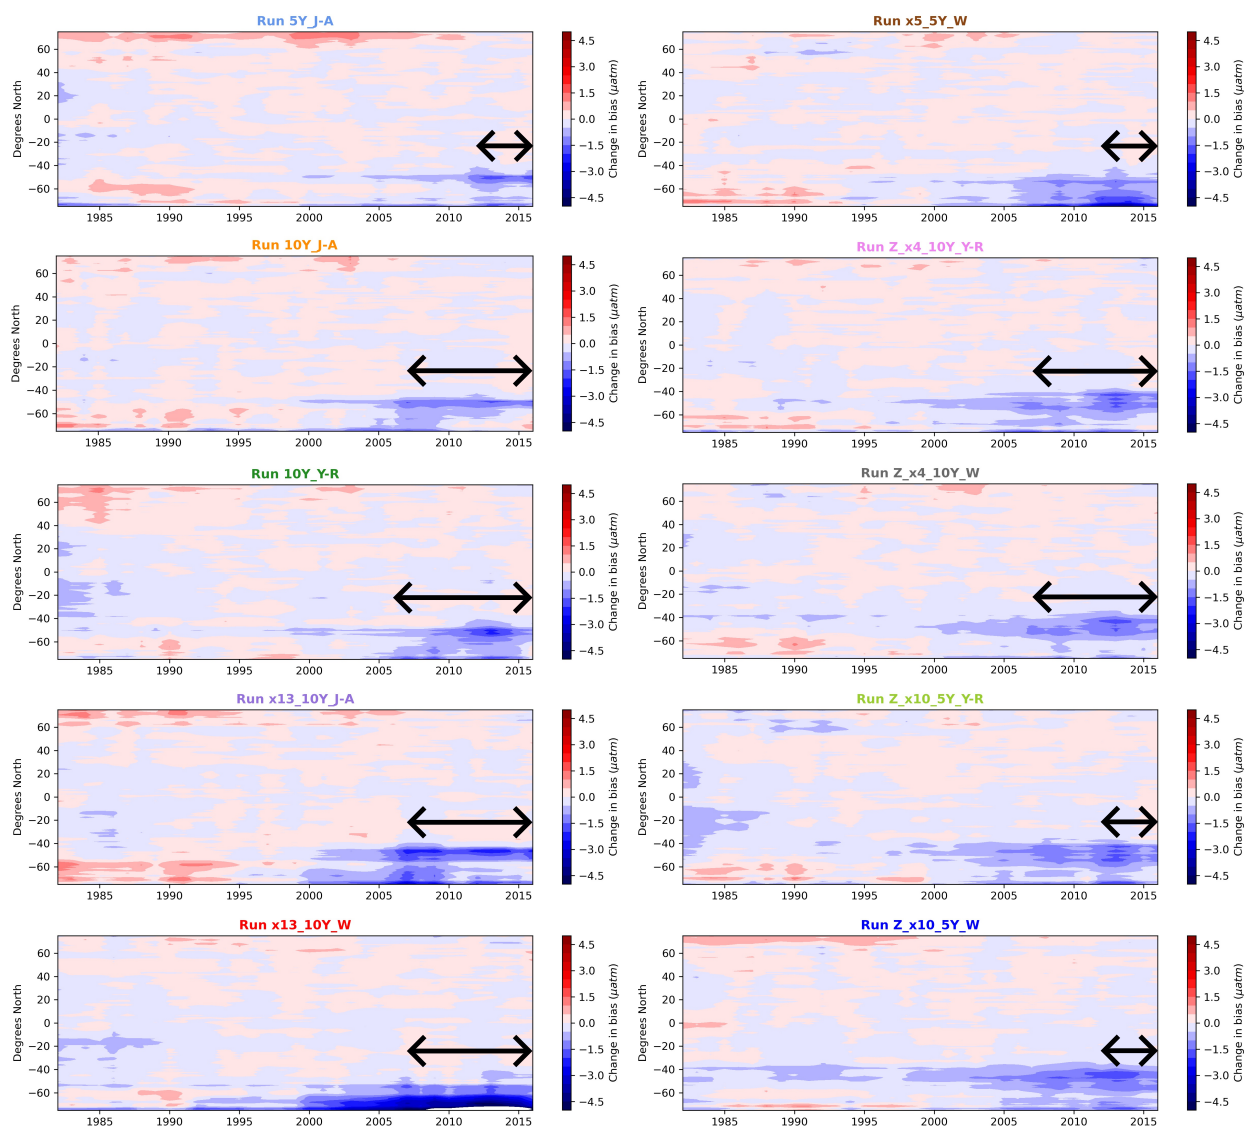

47  
 48 **Figure S6:** Zonal mean, annual mean Hovmöller of the change in bias when comparing the different SAILDRONE USV sampling strategies to the baseline SOCAT  
 49 reconstruction. Red and blue areas represent regions where the change in bias is positive or negative, respectively. The negative change in bias in southern  
 50 latitudes represents an improvement considering the overestimation of pCO<sub>2</sub> shown by the baseline reconstruction (**Fig. 6a**). Bias improvements expand  
 51 backwards to year 2000 for all runs, which is well beyond the duration of USV additions (shown by arrow on panel).

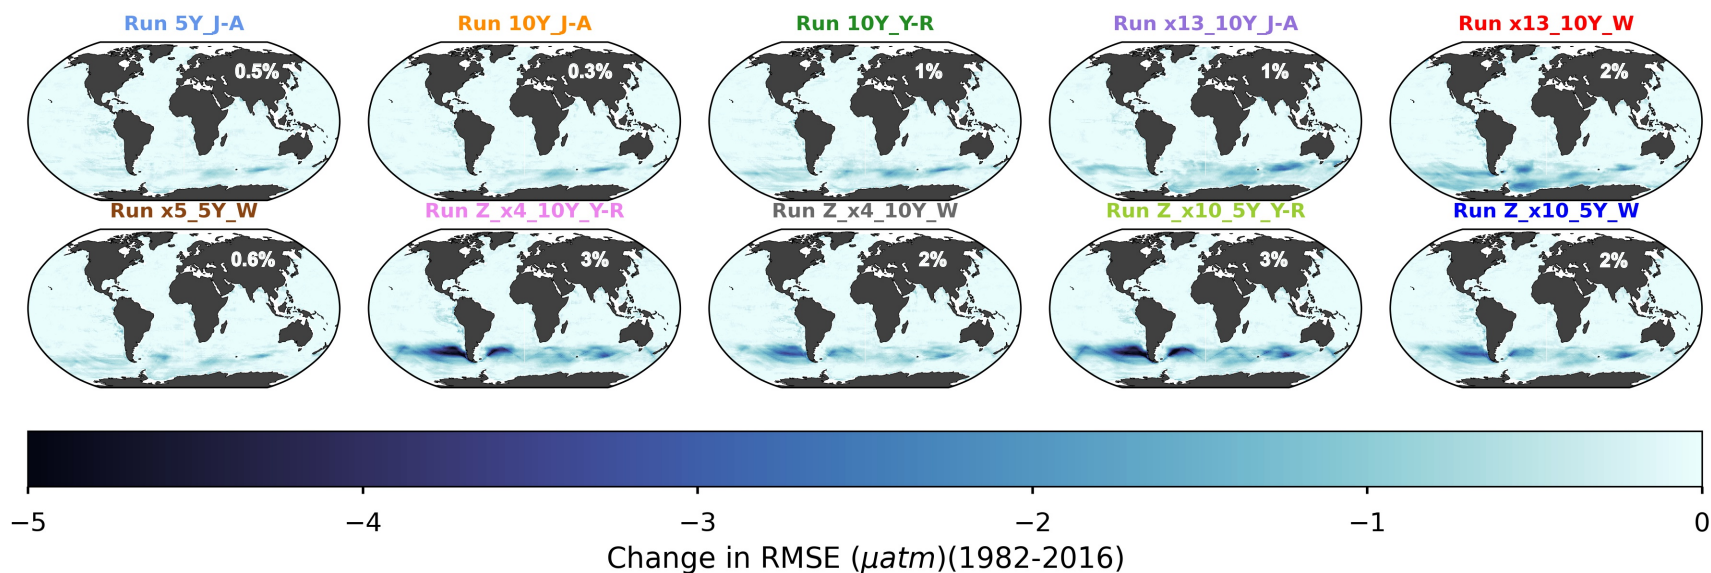

53  
54  
55  
56  
57  
58  
59

**Figure S7:** Change in RMSE when comparing the different Sairdron USV sampling strategies to the baseline SOCAT reconstruction. The RMSE was calculated by comparing each machine learning reconstruction to the testbed ‘model truth’, averaged over the 75 ensemble members over the period of 1982 through 2016. Dark areas represent regions with improvement in RMSE (i.e., decreasing RMSE). Improvement in RMSE occurs mainly in southern latitudes ( $<35^{\circ}\text{S}$ ), where the baseline reconstruction demonstrated high RMSEs (**Fig. 3b**). Percent values represent improvement compared to the SOCAT baseline.

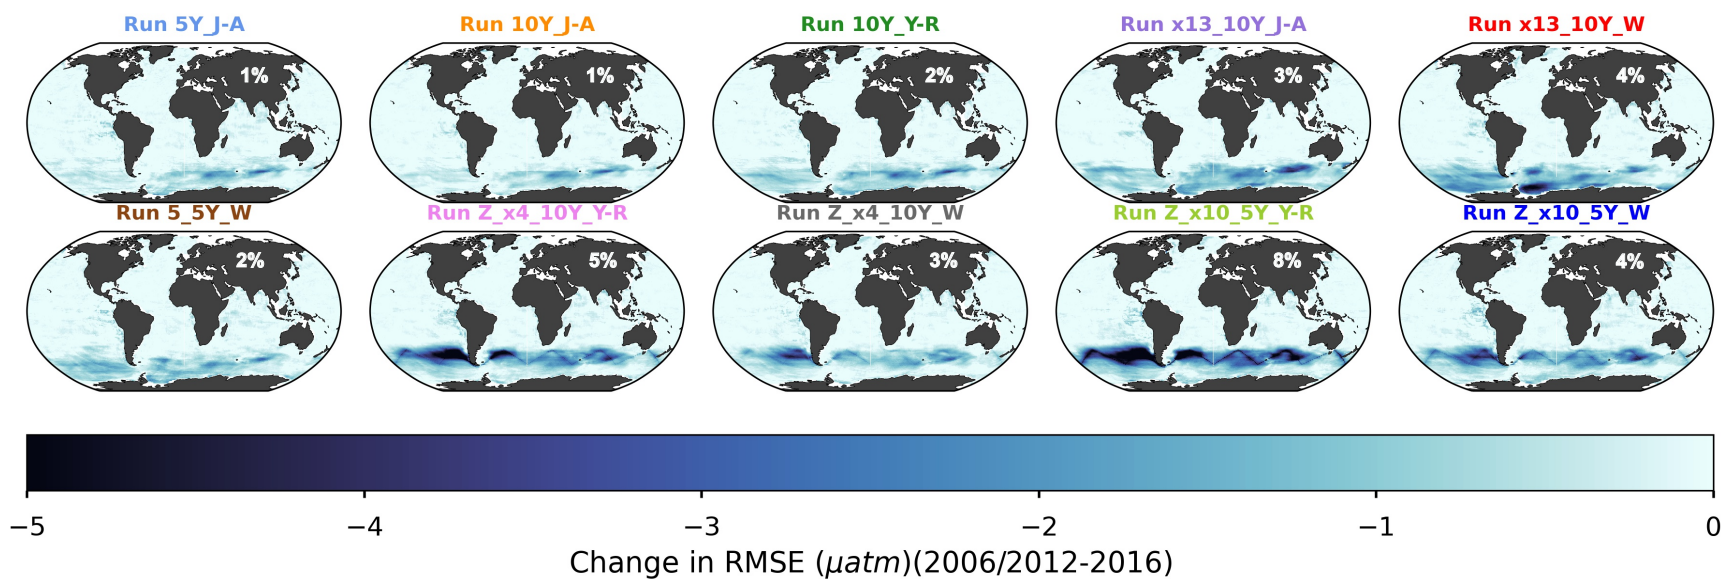

60  
61  
62  
63

**Figure S8:** Same as **Figure A7**, but averaged over the years of USV sample addition (2006-2016 or 2012-2016). Compared to the mean of the entire testbed period (1982-2016; **Fig. A7**), there is improvement in bias for all runs. Percent values represent improvement compared to the SOCAT baseline.

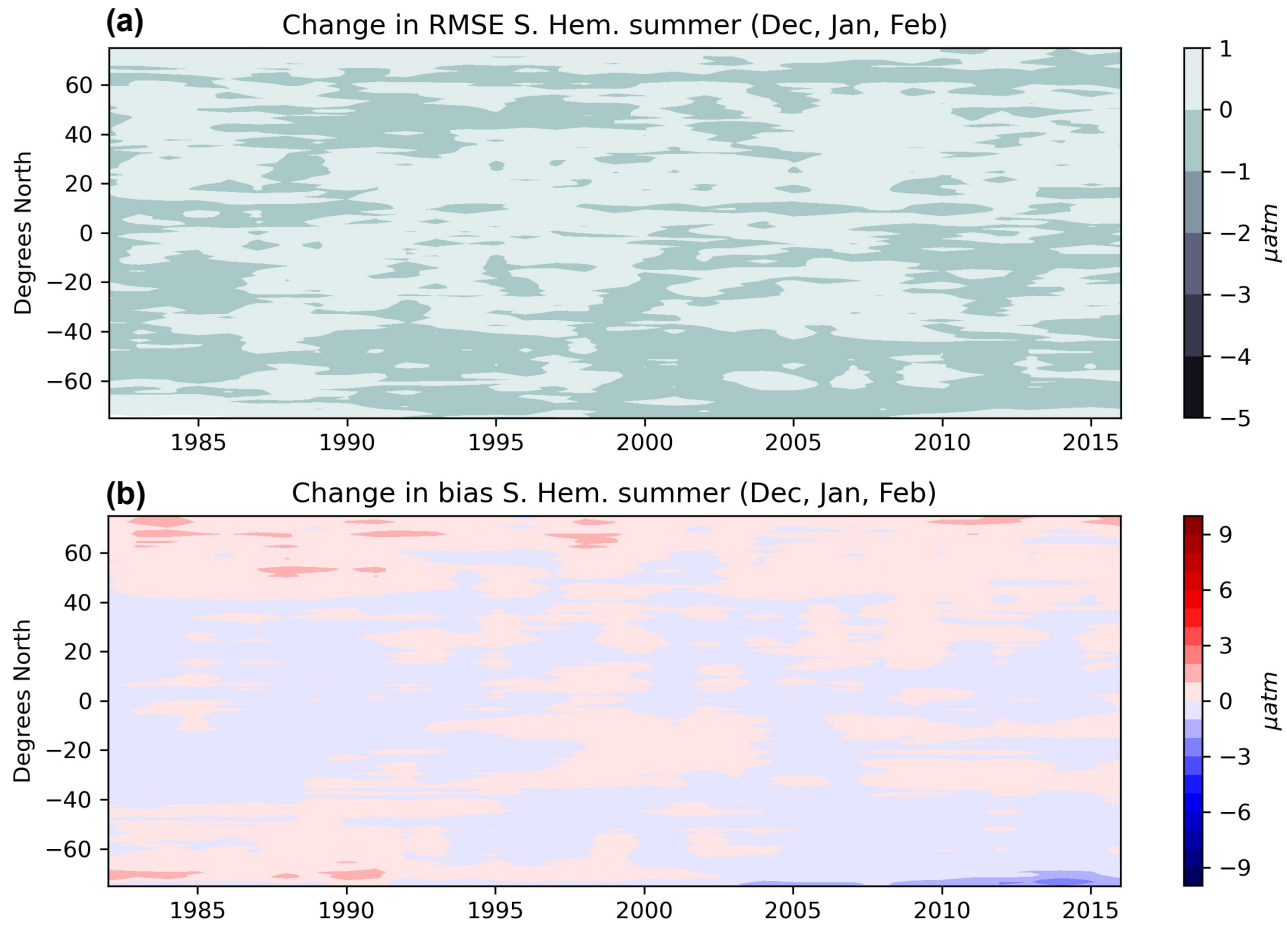

64  
 65 **Figure S9:** Zonal mean, DJF (December, January, February) mean Hovmöller change in RMSE (a) and bias (b) for run 'x13\_10Y\_W' compared to the baseline  
 66 SOCAT reconstruction. There is minimal improvement in RMSE and bias during southern hemisphere summer months.  
 67



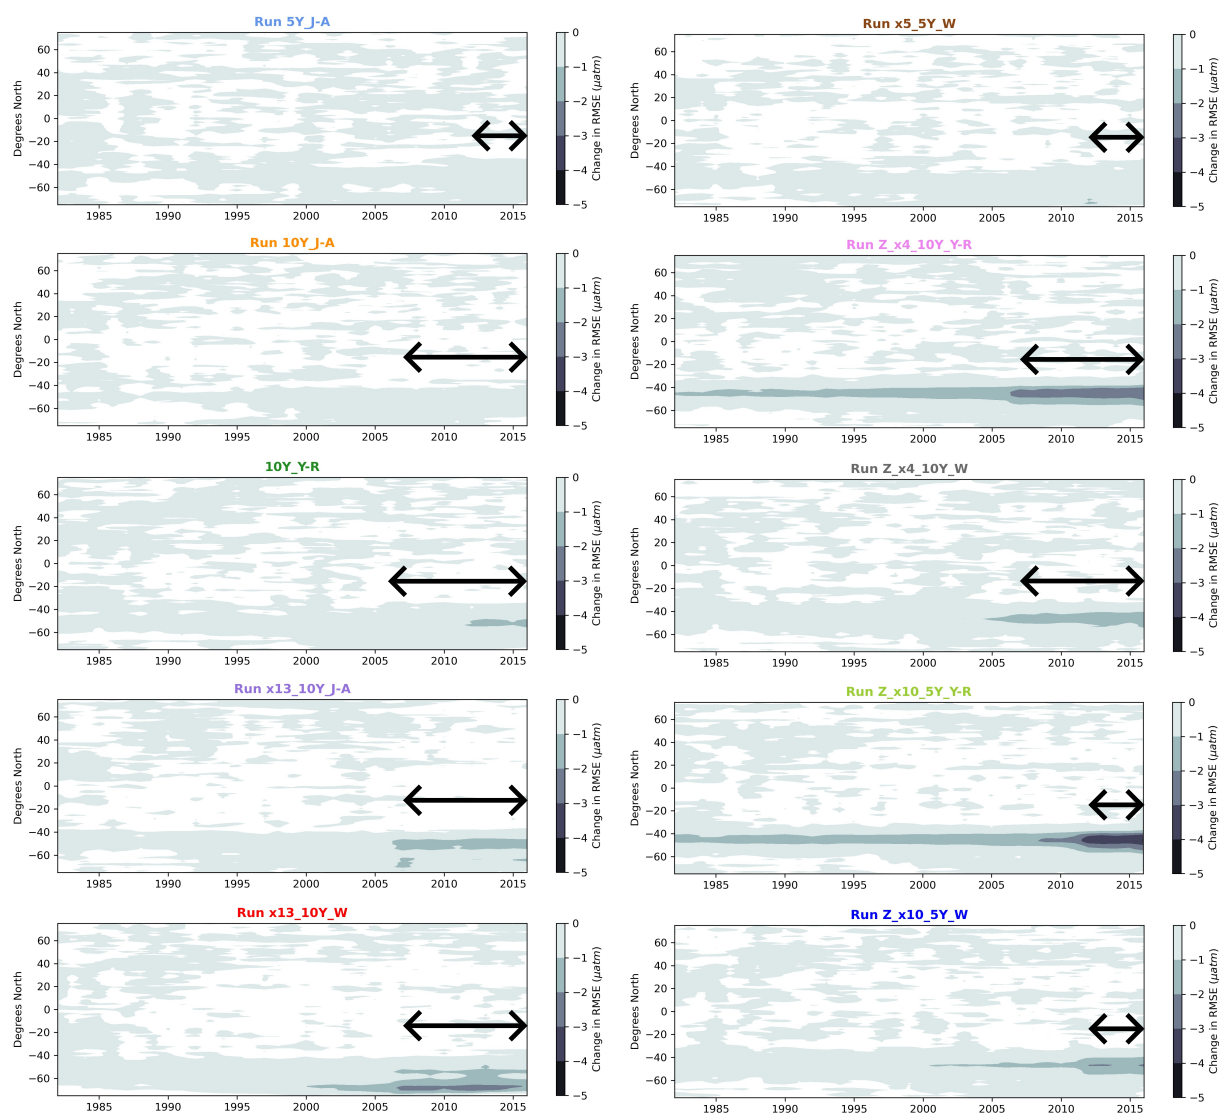

68  
69 **Figure S10:** Zonal mean, annual mean Hovmöller of the change in RMSE when comparing the different Saildrone USV sampling strategies to the baseline SOCAT  
70 reconstruction. The most significant improvement in RMSE is shown for the ‘zigzag’-runs and the ‘one-latitude’-run ‘x13\_10Y\_W’ in the Southern Ocean during  
71 the last 5-10 years when the additional Saildrone observations are introduced (shown by arrow on panel). For the ‘year-round’ ‘zigzag’ runs, improvement expands  
72 back in time to the beginning of the testbed period.

### Change in RMSE S. Hem. winter months (JJA)

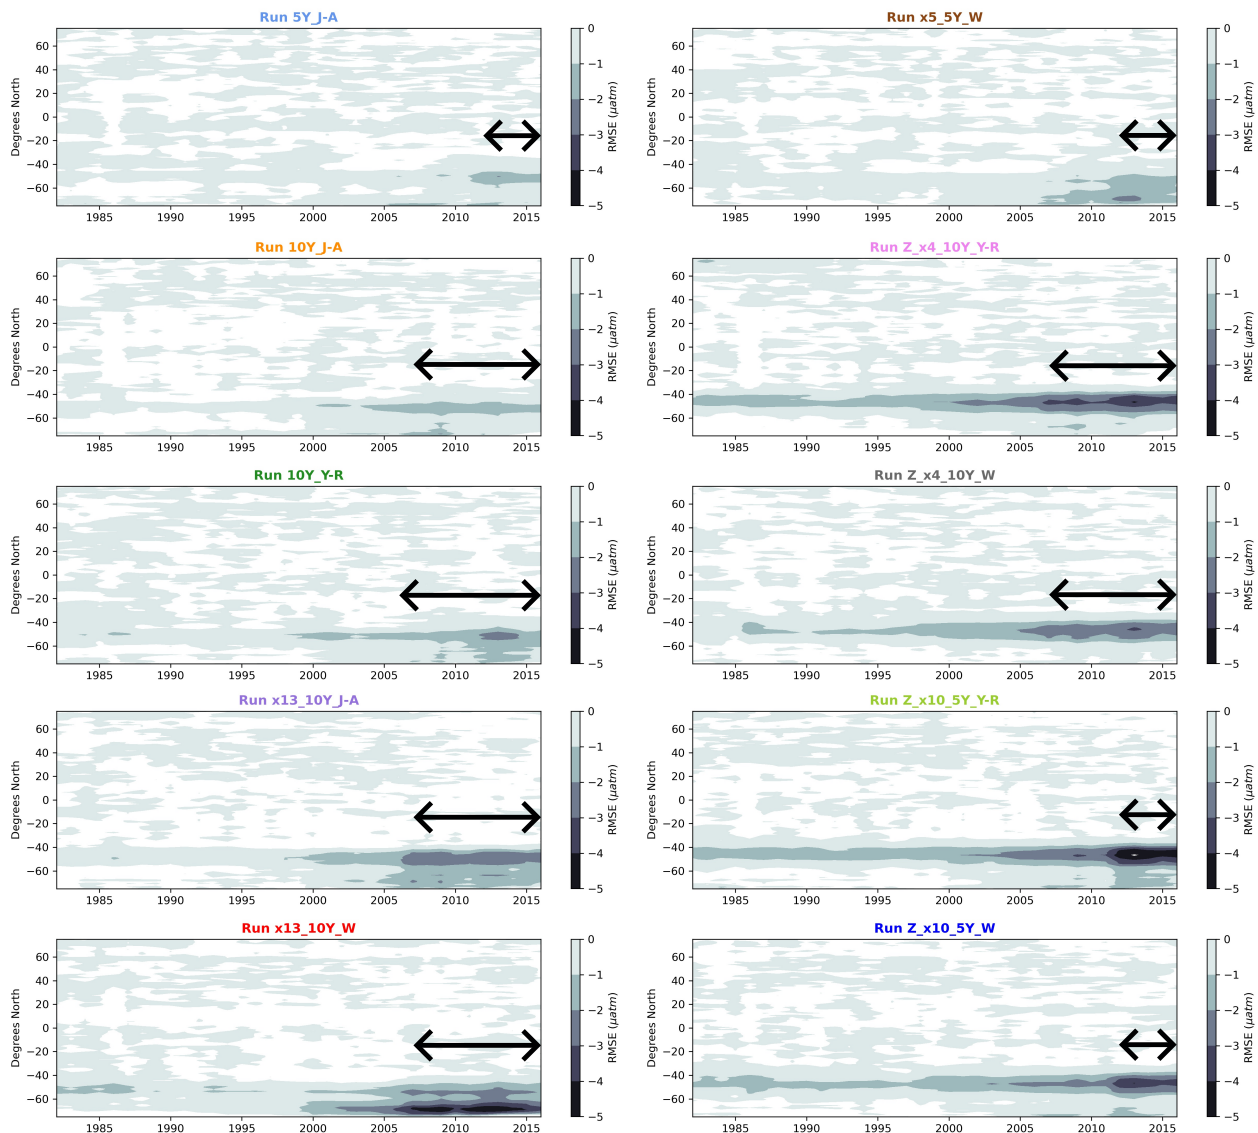

**Figure S11:** Same as **Figure A10**, but for southern hemisphere winter months (i.e., JJA; June, July, August). Compared to **Figure A10** (averaging over all months), there is improvement in RMSE both in terms of the magnitude and duration. Arrows represent the timing of Saldron USV sample additions.

73  
74  
75

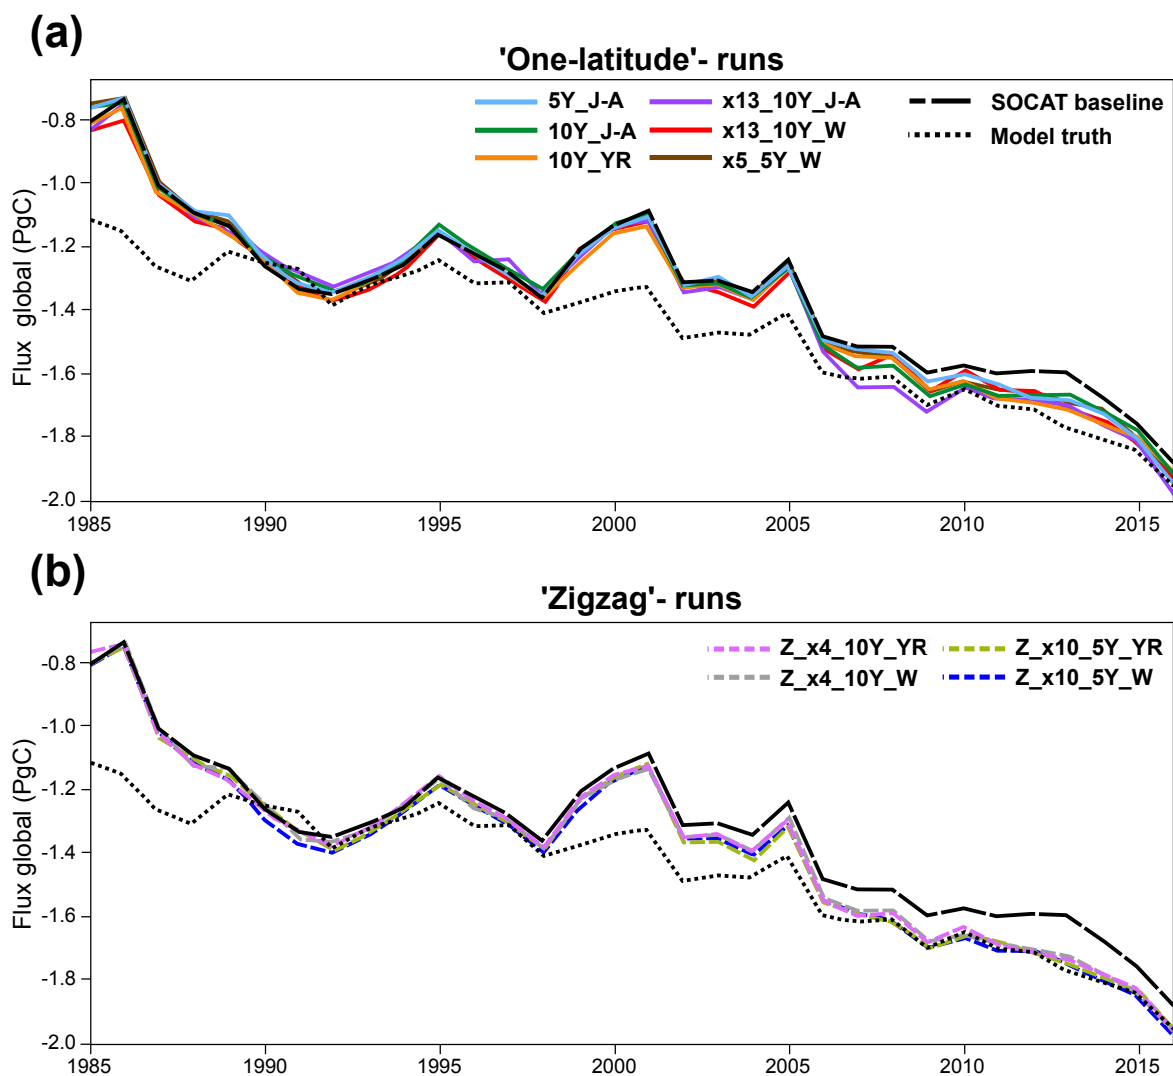

76  
 77 **Figure S12.** Globally annually averaged air-sea CO<sub>2</sub> flux for ‘one-latitude’ (a) and ‘zigzag’ (b) runs (see **Table 1**), including the SOCAT baseline (black dashed  
 78 line) and the testbed ‘model truth’ (black dotted line), averaged over the 75 ensemble members. Runs highlighted in bold correspond to the two selected runs whose  
 79 maps are shown in the main text (**Figs. 4, 6 7 and 9**). Generally, the Saildrone USV additions lead to an increased sink in the Southern Ocean compared to the  
 80 SOCAT baseline. The ‘zigzag’ runs (dashed lines) generate a stronger sink compared to the ‘one-latitude’ runs (solid lines), and closely match the model truth the  
 81 last ten years of the testbed.  
 82



83

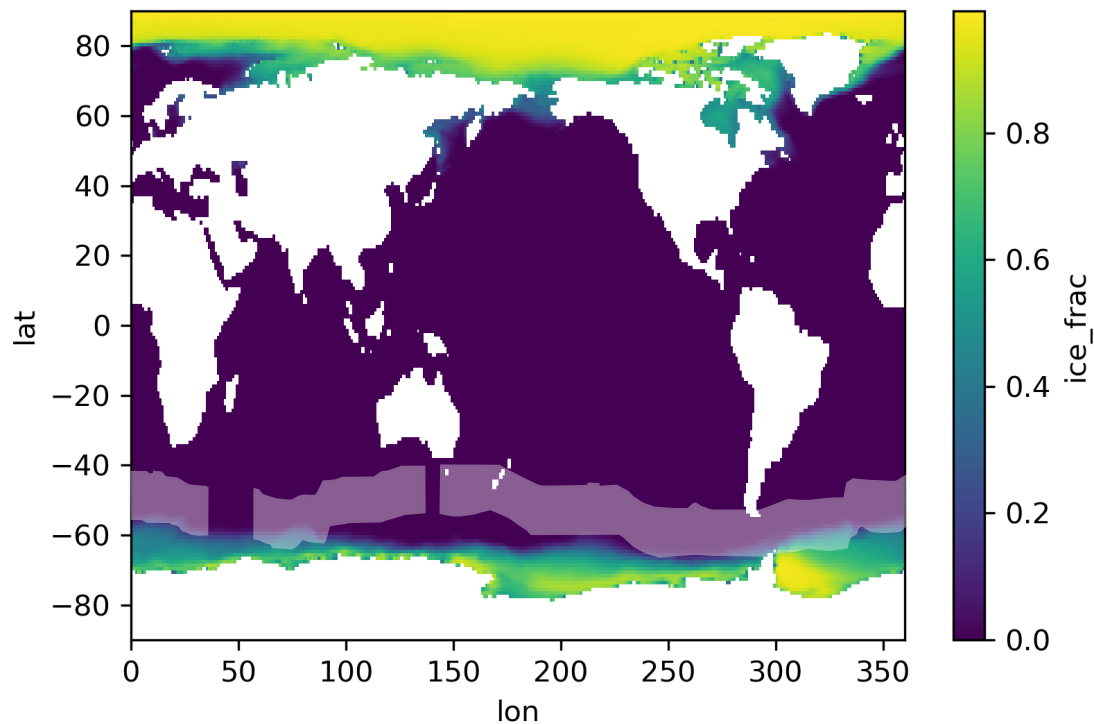

84  
85  
86  
87  
88  
89  
90

**Figure S13:** Map of global sea-ice extent as defined by the SeaFlux product (Fay et al., 2021). Light shaded areas represent the spatial extent of Saldrone USV sampling for run ‘x13\_10Y\_J-A’ and ‘x13\_10Y\_W’, where the ‘real-world’ Saldrone USV track (Sutton et al., 2021) was repeated six times by 1° north and south. The southernmost sampling occurs within the ice-zone as defined by ice fraction (‘ice-frac’) > 0.

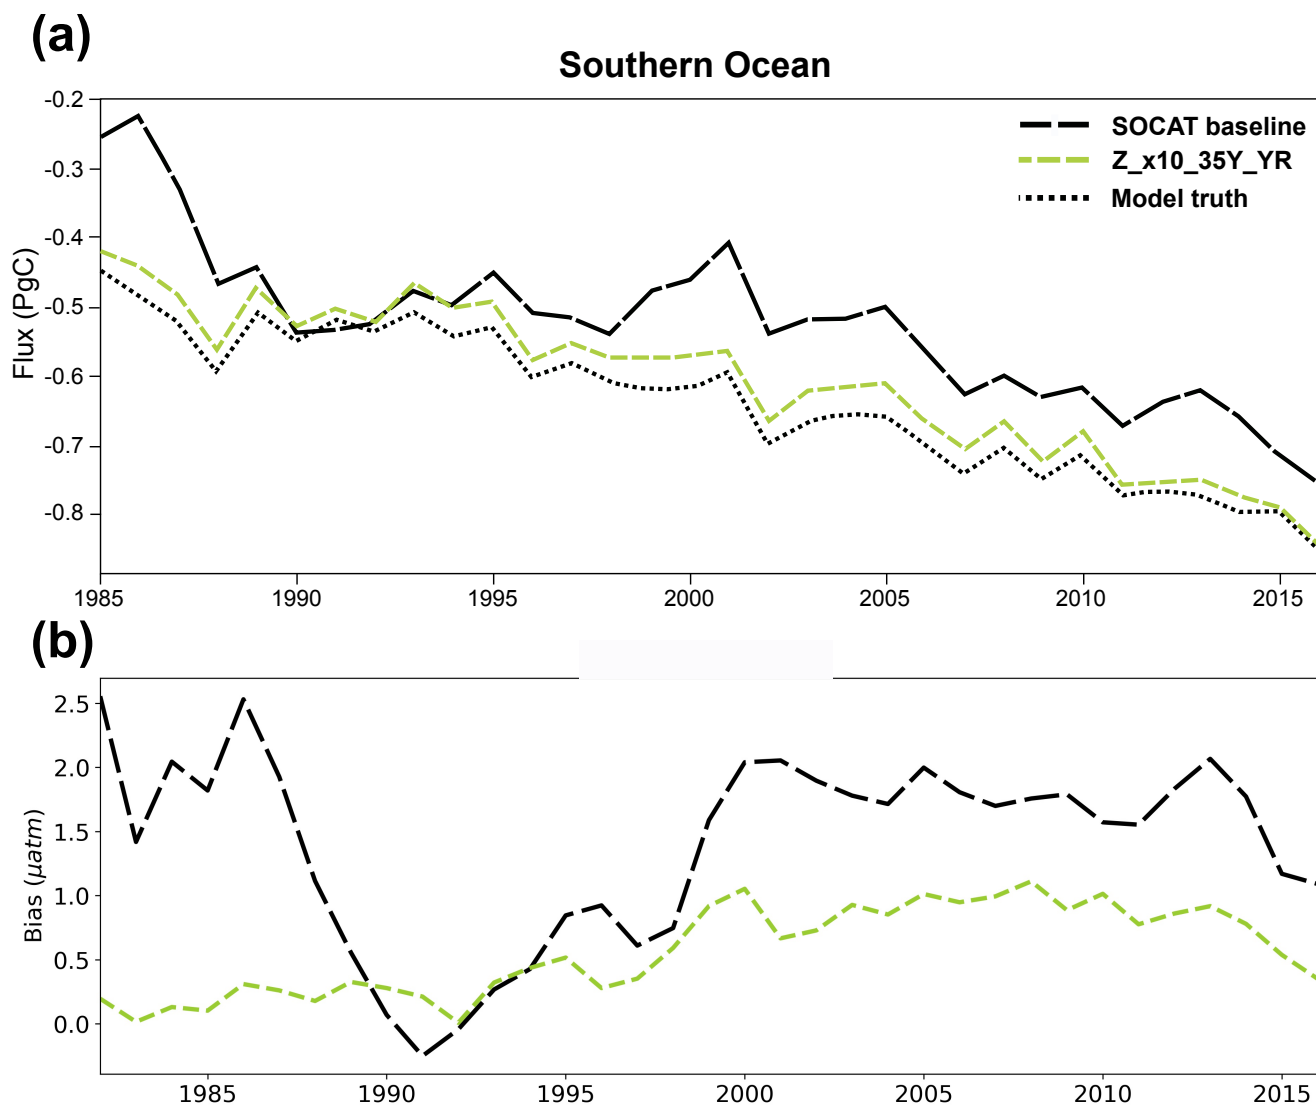

91  
92 **Figure S14.** Southern Ocean ( $> 35^\circ$  S) annually averaged air-sea  $\text{CO}_2$  flux **(a)** and bias **(b)** for run 'Z\_x10\_35Y\_YR' and the SOCAT baseline. Run  
93 'Z\_x10\_35Y\_YR' closely match the 'model truth' (black dotted line) air-sea flux for the entire testbed period **(a)**, and show a significant dampening in bias  
94 variability compared to the SOCAT baseline **(b)**.  
95

| Run name                          | Baseline    | 5Y J-A     | 10Y J-A    | 10Y YR     | x13 10Y J-A | x13 10Y W    | x5 5Y W    | Z x4 10Y YR | Z x4 10Y W | Z x10 5Y YR | Z x10 5Y W |
|-----------------------------------|-------------|------------|------------|------------|-------------|--------------|------------|-------------|------------|-------------|------------|
| <i>Saildrone track</i>            | NA          | One-lat    | One-lat    | One-lat    | One-lat     | One-lat      | One-lat    | Zigzag      | Zigzag     | Zigzag      | Zigzag     |
| <i>Years of sampling</i>          | NA          | 5          | 10         | 10         | 10          | 10           | 5          | 10          | 10         | 5           | 5          |
| <i>Duration of sampling</i>       | NA          | Jan-Aug    | Jan-Aug    | Year-round | Jan-Aug     | SO winter    | SO winter  | Year-round  | SO winter  | Year-round  | SO winter  |
| <i>Additional observations</i>    | NA          | 2,075      | 4,150      | 4,150      | 44,250      | 25,395       | 5,022      | 7,600       | 2,500      | 11,400      | 3,800      |
| <b>Mean bias (µatm)</b>           |             |            |            |            |             |              |            |             |            |             |            |
| <i>Testbed period (1982-2016)</i> |             |            |            |            |             |              |            |             |            |             |            |
| Globally                          | 0.63        | 0.59       | 0.59       | 0.52       | 0.53        | <b>0.39</b>  | 0.57       | 0.51        | 0.51       | 0.45        | 0.44       |
| NORTH (35°N-90°N)                 | <b>0.11</b> | 0.24       | 0.20       | 0.25       | 0.20        | 0.17         | 0.16       | 0.16        | 0.16       | 0.12        | 0.20       |
| MID (35°S-35°N)                   | 0.23        | 0.21       | 0.22       | 0.14       | 0.20        | 0.15         | 0.23       | 0.20        | 0.18       | <b>0.13</b> | 0.18       |
| SOUTH (90°S-35°S)                 | 1.4         | 1.3        | 1.2        | 1.1        | 1.1         | <b>0.80</b>  | 1.2        | 1.1         | 1.1        | 1.0         | 0.87       |
| SO winter months (JJA)            | 1.3         | 1.2        | 1.2        | 1.1        | 1.1         | <b>0.90</b>  | 1.2        | 0.93        | 1.0        | 0.94        | 0.95       |
| SO summer months (DJF)            | 0.070       | 0.11       | 0.15       | 0.10       | 0.15        | <b>0.019</b> | 0.11       | 0.25        | 0.073      | 0.16        | 0.066      |
| <i>2006/2012-2016</i>             |             |            |            |            |             |              |            |             |            |             |            |
| Globally                          | 0.51*       | 0.27       | 0.34       | 0.28       | 0.19        | <b>0.03</b>  | 0.21       | 0.23        | 0.24       | 0.17        | 0.07       |
| SOUTH (90°S-35°S)                 | 1.6*        | 0.93       | 1.1        | 1.0        | 0.72        | <b>0.37</b>  | 0.73       | 0.89        | 0.92       | 0.67        | 0.55       |
| SOUTH (90°S-35°S) Jun, Jul, Aug   | 4.2*        | 2.6        | 2.7        | 2.8        | 2.2         | 1.8          | 2.5        | 1.8         | 2.4        | <b>1.2</b>  | 2.0        |
| <i>1984-1994</i>                  |             |            |            |            |             |              |            |             |            |             |            |
| Globally                          | 0.61        | 0.66       | 0.64       | 0.57       | 0.65        | <b>0.50</b>  | 0.67       | 0.60        | 0.59       | 0.54        | 0.53       |
| <i>1995-2005</i>                  |             |            |            |            |             |              |            |             |            |             |            |
| Globally                          | 0.52        | 0.51       | 0.51       | 0.46       | 0.46        | <b>0.35</b>  | 0.47       | 0.43        | 0.43       | 0.39        | 0.37       |
| <b>Mean RMSE (µatm)</b>           |             |            |            |            |             |              |            |             |            |             |            |
| <i>Testbed period (1982-2016)</i> |             |            |            |            |             |              |            |             |            |             |            |
| Globally                          | 7.9         | 7.9        | 7.9        | 7.9        | 7.8         | 7.8          | 7.9        | <b>7.7</b>  | 7.8        | <b>7.7</b>  | 7.8        |
| NORTH (35°N-90°N)                 | <b>9.1</b>  | <b>9.1</b> | <b>9.1</b> | 9.4        | 9.4         | 9.4          | <b>9.2</b> | 9.3         | 9.4        | 9.4         | 9.4        |
| MID (35°S-35°N)                   | <b>7.2</b>  | <b>7.2</b> | <b>7.2</b> | 7.3        | 7.4         | 7.4          | <b>7.2</b> | 7.3         | 7.3        | 7.4         | 7.3        |
| SOUTH (90°S-35°S)                 | 8.5         | 8.4        | 8.4        | 8.5        | 8.4         | 8.3          | 8.3        | 8.2         | 8.4        | <b>8.1</b>  | 8.3        |
| <i>2006/2012-2016</i>             |             |            |            |            |             |              |            |             |            |             |            |
| Globally                          | 7.7*        | 7.7        | 7.5        | 7.5        | 7.4         | 7.3          | 7.6        | <b>7.2</b>  | 7.4        | <b>7.2</b>  | 7.5        |
| SOUTH (90°S-35°S)                 | 8.4*        | 8.2        | 8.1        | 7.8        | 7.6         | 7.5          | 8.0        | 7.2         | 7.7        | <b>6.9</b>  | 7.6        |
| SOUTH (90°S-35°S) Jun, Jul, Aug   | 9.2*        | 8.4        | 8.4        | 8.2        | 7.6         | 7.5          | 8.3        | 7.5         | 7.8        | <b>6.9</b>  | 7.5        |
| <i>1984-1994</i>                  |             |            |            |            |             |              |            |             |            |             |            |
| Globally                          | 8.3         | 8.3        | 8.4        | 8.3        | 8.3         | 8.3          | 8.3        | <b>8.2</b>  | 8.3        | <b>8.2</b>  | <b>8.2</b> |
| <i>1995-2005</i>                  |             |            |            |            |             |              |            |             |            |             |            |
| Globally                          | 7.6         | 7.6        | 7.6        | 7.6        | 7.6         | 7.5          | 7.6        | <b>7.4</b>  | 7.5        | 7.5         | 7.5        |

**Table S1:** Mean bias and RMSE (in µatm) for various time periods, latitude bands and seasons for all runs, including the SOCAT baseline. Green, bold values represent the best score for each category. The ‘one-latitude’ (‘one-lat’) track incorporates the ‘real-world’ Saildrone USV route from Sutton et al. (2021), while the ‘zigzag’ track represents potential future meridional sampling (see Fig. 2; Table 1). ‘Additional observations’ = 1°x1° monthly Saildrone USV observations (not including SOCAT). J-A= January-August. YR = year-round. W = southern hemisphere winter. x4, x5, x10 and x13 = four, five, ten and 13 USVs. SO winter = Southern hemisphere winter months, i.e., June, July, August, and also including September. \*Average value of the mean of 2006-2016 and 2012-2016.

| <b>Mean flux (Pg C/yr)</b> | <b>Model truth</b> | <b>SOCAT baseline</b> |
|----------------------------|--------------------|-----------------------|
| <b>Globally</b>            |                    |                       |
| 1982-2016                  | -1.5               | -1.3                  |
| 2006-2016                  | -1.7               | -1.6                  |
| 2012-2016                  | -1.8               | -1.7                  |
| <b>SOUTH (90°S-35°S)</b>   |                    |                       |
| 1982-2016                  | -0.6               | -0.5                  |
| 2006-2016                  | -0.8               | -0.7                  |
| 2012-2016                  | -0.8               | -0.7                  |

**Table S2:** Global and Southern Ocean mean air-sea CO<sub>2</sub> fluxes (in Pg C yr<sup>-1</sup>) for the testbed ‘model truth’ and the SOCAT baseline.

104  
105  
106  
107  
108  
109  
110  
111  
112  
113  
114  
115  
116

| Run name                       | 5Y J-A   | 10Y J-A | 10Y YR   | x13 10Y J-A | x13 10Y W | x5 5Y W   | Z x10 5Y W | Z x4 10Y W | Z x10 5Y YR | Z x10 5Y W |          |      |          |      |          |      |          |      |          |      |
|--------------------------------|----------|---------|----------|-------------|-----------|-----------|------------|------------|-------------|------------|----------|------|----------|------|----------|------|----------|------|----------|------|
| <i>Saildrone track</i>         | One-lat  | One-lat | One-lat  | One-lat     | One-lat   | One-lat   | Zigzag     | Zigzag     | Zigzag      | Zigzag     |          |      |          |      |          |      |          |      |          |      |
| <i>Years of sampling</i>       | 5        | 10      | 10       | 10          | 10        | 5         | 10         | 10         | 5           | 5          |          |      |          |      |          |      |          |      |          |      |
| <i>Duration of sampling</i>    | Jan-Aug  | Jan-Aug | Shifted  | Jan-Aug     | SO winter | SO winter | Year-round | SO winter  | Year-round  | S winter   |          |      |          |      |          |      |          |      |          |      |
| <i>Additional observations</i> | 2,075    | 4,150   | 4,150    | 44,250      | 25,395    | 5,022     | 7,600      | 2,500      | 11,400      | 3,800      |          |      |          |      |          |      |          |      |          |      |
|                                | % change | diff    | % change | diff        | % change  | diff      | % change   | diff       | % change    | diff       | % change | diff | % change | diff | % change | diff | % change | diff | % change | diff |
| <b>Globally</b>                |          |         |          |             |           |           |            |            |             |            |          |      |          |      |          |      |          |      |          |      |
| <b>1982-2016</b>               | -1       | 0.01    | -1       | 0.02        | -2        | 0.03      | -2         | 0.03       | -2          | 0.03       | -1       | 0.02 | -3       | 0.04 | -3       | 0.04 | -4       | 0.05 | -4       | 0.06 |
| <b>2006/2012-2016</b>          | -4       | 0.06    | -3       | 0.06        | -4        | 0.06      | -6         | 0.09       | -3          | 0.06       | -3       | 0.06 | -5       | 0.09 | -5       | 0.08 | -6       | 0.10 | -7       | 0.12 |
| <b>90°S-35°S</b>               |          |         |          |             |           |           |            |            |             |            |          |      |          |      |          |      |          |      |          |      |
| <b>1982-2016</b>               | -2       | 0.01    | -3       | 0.02        | -5        | 0.03      | -6         | 0.03       | -5          | 0.03       | -3       | 0.02 | -8       | 0.04 | -7       | 0.04 | -9       | 0.05 | -11      | 0.06 |
| <b>2006/2012-2016</b>          | -10      | 0.07    | -9       | 0.06        | -10       | 0.07      | -14        | 0.09       | -9          | 0.06       | -9       | 0.06 | -13      | 0.09 | -13      | 0.08 | -15      | 0.10 | -15      | 0.10 |

**Table S3:** Difference ('diff') between calculated mean air-sea flux of individual Saildrone USV runs from the SOCAT baseline (in Pg C yr<sup>-1</sup>), and change shown by %. There is a negative change from the SOCAT baseline, i.e., all Saildrone USV runs predict a stronger sink. 'Additional observations' = 1°x1° monthly Saildrone observations (not including SOCAT). 'SO winter' = Southern hemisphere winter months, i.e., June, July, August, and also including September. Testbed period = 1982-2016.

117  
118  
119  
120  
121  
122  
123  
124  
125  
126  
127
